# Supplementary material
Source: Springer Nature journal article supplement (https://www.springermedizin.de/resource/supplementary/12894_2013_290_MOESM3_ESM.pdf/9513390)

# ROC Curve

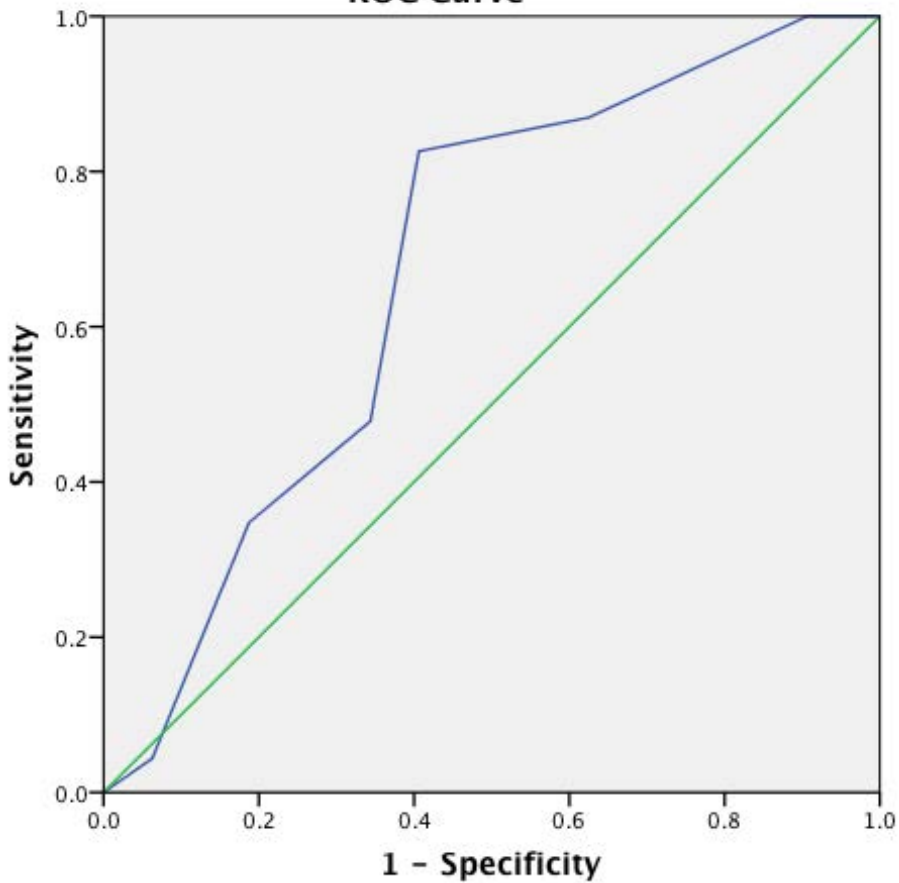

Supplement: MOESM3 [file 9513390]
